# Supplementary material
Source: ML conference proceedings conference paper supplement (https://openaccess.thecvf.com/content/CVPR2026/html/He_High-Fidelity_Diffusion_Face_CVPR_2026_paper.html)
Supplement: Supplementary file 1 [file He_High-Fidelity_Diffusion_Face_CVPR_2026_supplemental.pdf]

## Supplementary Material

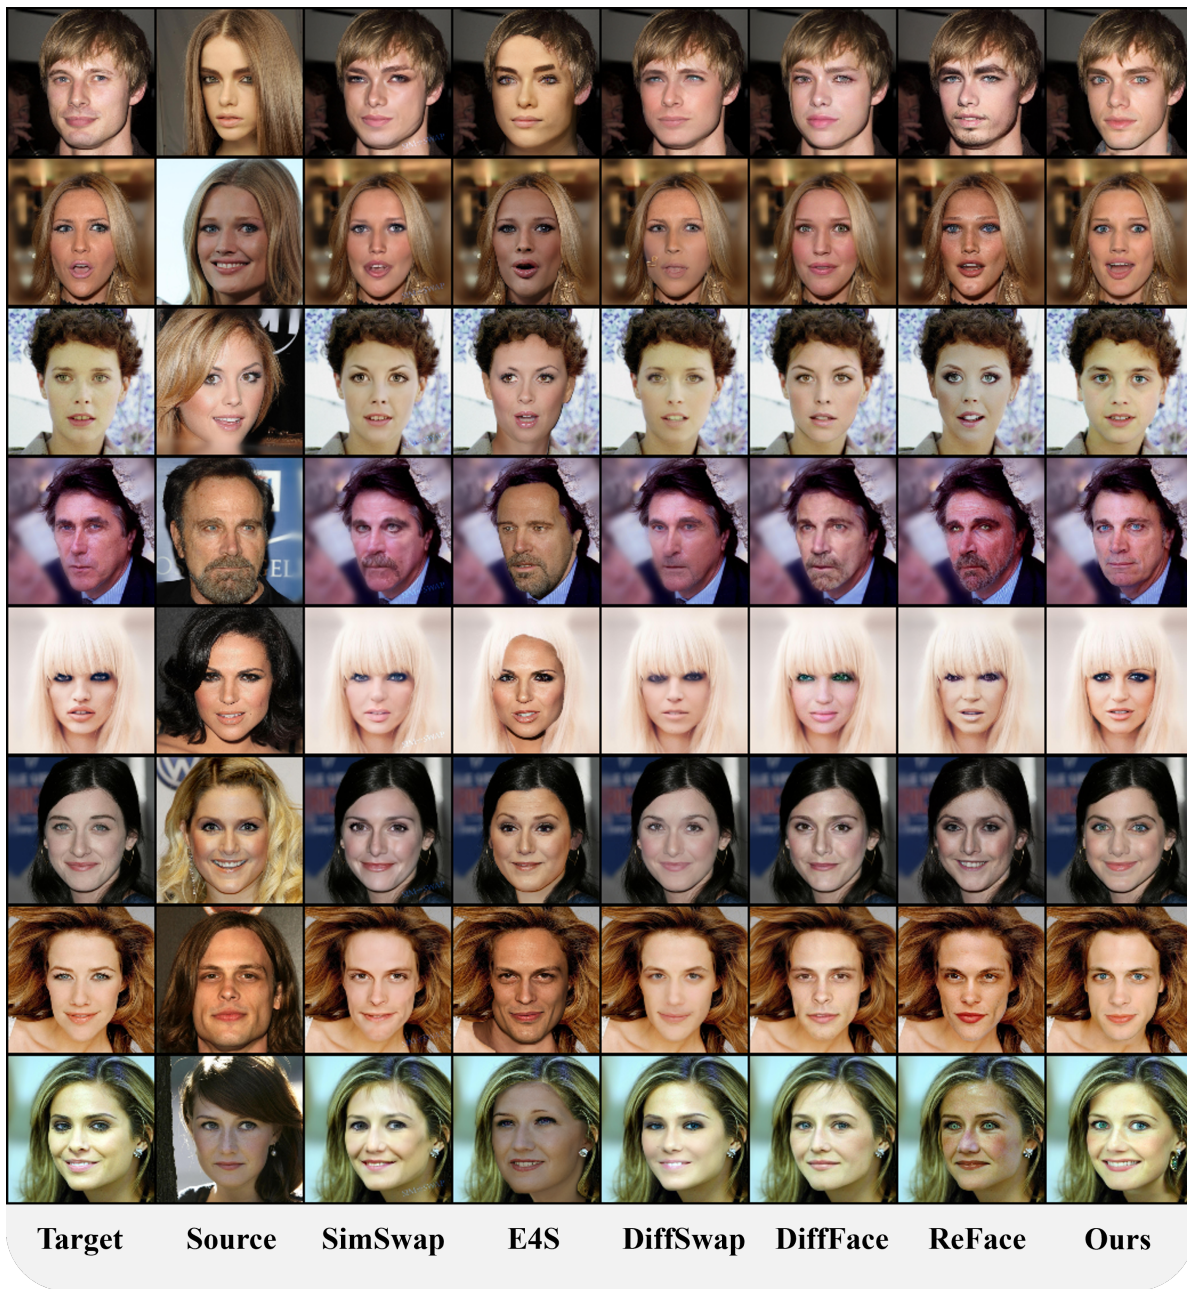

Figure 1. CelebA-HQ results with various approaches.

### 1. Additional results on CelebA-HQ

To further demonstrate our model, we evaluate it in the CelebA-HQ dataset and post the samples in Figure 1 without cherry pick. Our results well balance the image quality, identity preservation and attribute consistency, as discussed in the main body.

### 2. Training details

All the experiments are conducted on NVIDIA A100. We use the AdamW optimizer to perform gradient descent. In stage-1 and stage-2 training, we use a fixed learning rate of  $10^{-5}$ , effective batch-size of 64 and train 200000 steps for each. In stage-3 training (refinement post-tuning), we use the same hyperparameters except for a reduced learning rate of  $10^{-6}$  and training 50000 steps.
